# Supplementary material
Source: PubMed Central journal article supplement (PMC7889650)

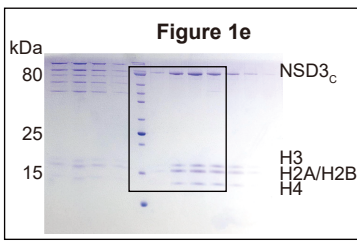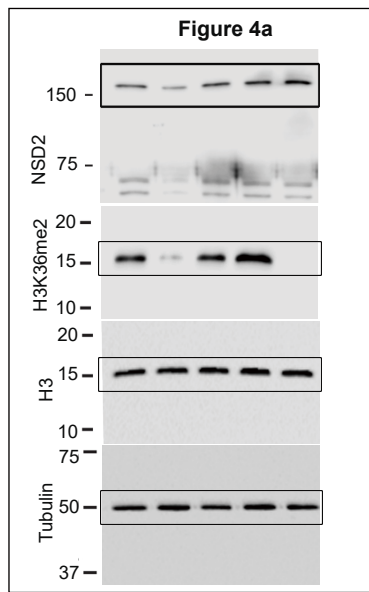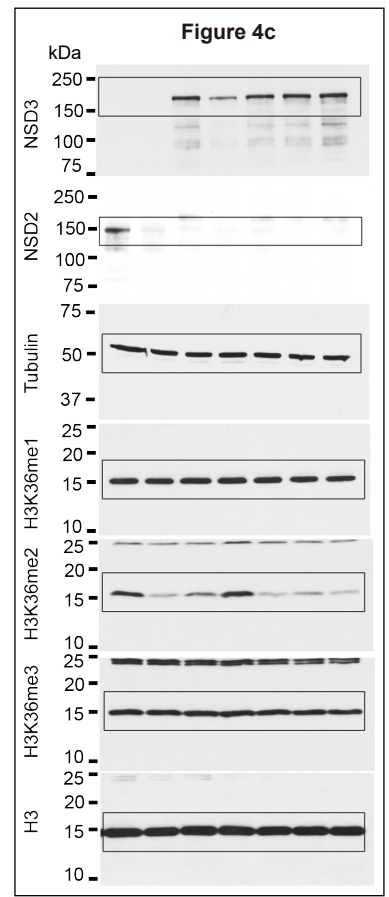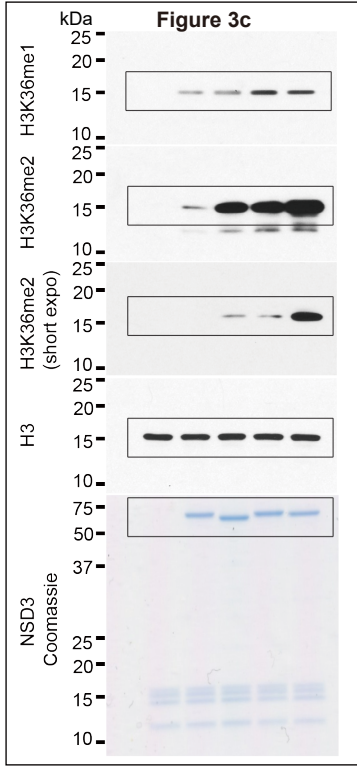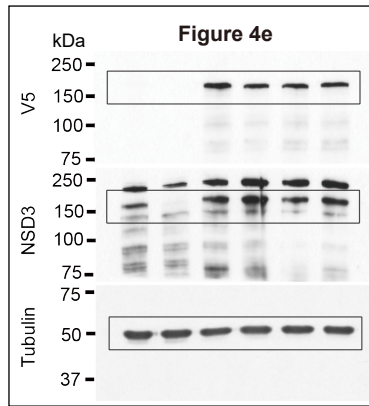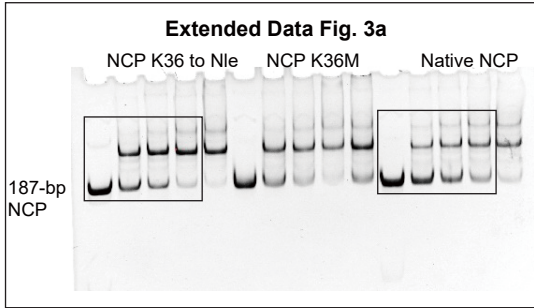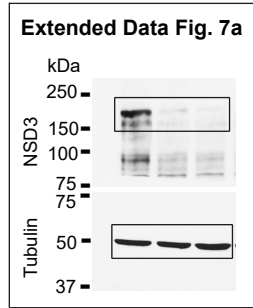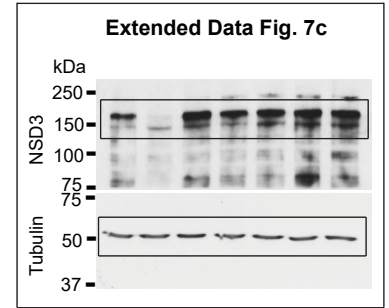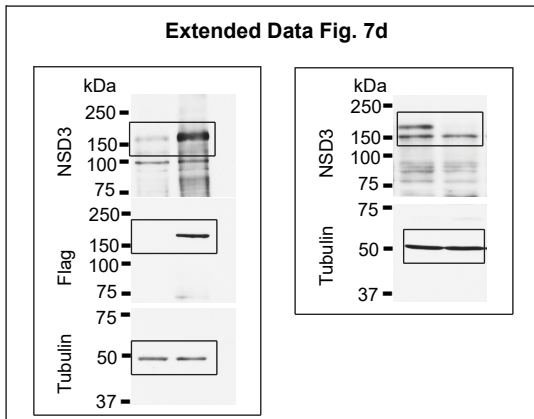

Supplement: NIHMS1641450-supplement-2.pdf [file NIHMS1641450-supplement-2.pdf]
